# Supplementary material for: Superior supercapacitor performance of Bi2S3 nanorod/reduced graphene oxide composites
Source: Royal Society of Chemistry journal article supplement (doi:10.1039/d0dt03594g), 2020-01-01
Supplement: d0dt03594g1.pdf [file d0dt03594g1.pdf]

## Supporting Information

# Superior Supercapacitor Performance of $\text{Bi}_2\text{S}_3$ Nanorods/Reduced Graphene Oxide

Kalyan Ghosh<sup>a</sup> and Suneel Kumar Srivastava<sup>a,b,\*</sup>

<sup>a</sup>Department of Chemistry, Indian Institute of Technology Kharagpur, Kharagpur, India -  
721302.

<sup>b</sup> School of Energy Science and Engineering, Indian Institute of Technology, Kharagpur-  
721302

Email: kgkalyang5@gmail.com

\*Corresponding Author. Email: [sunil111954@yahoo.co.uk](mailto:sunil111954@yahoo.co.uk)

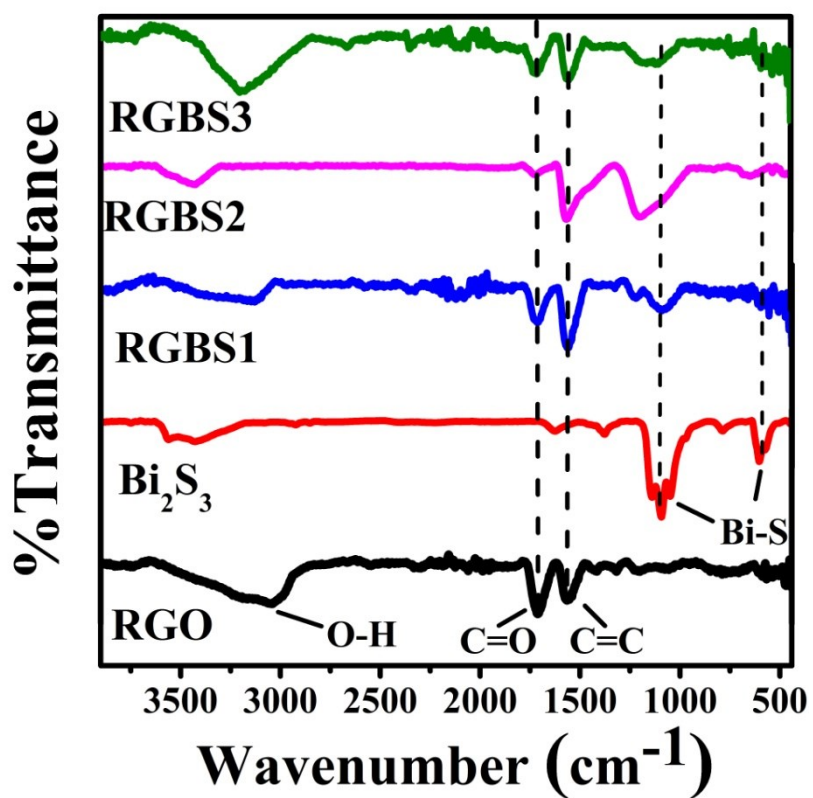

Figure S1. FTIR spectra of RGO, Bi<sub>2</sub>S<sub>3</sub> and Bi<sub>2</sub>S<sub>3</sub> nanorods/RGO composites.

The energy dispersive x-ray (EDX) analysis of Bi<sub>2</sub>S<sub>3</sub>/RGO composite was also performed to further discover the composition of the composites. As shown in Figure S2, EDX spectrum clearly demonstrated co-existence of Bi and S and closely corresponds to the Bi<sub>2</sub>S<sub>3</sub> phase.<sup>1</sup> The additional signals in the spectra correspond to C and O elements could be attributed to the carbon-coated copper grid and from RGO.

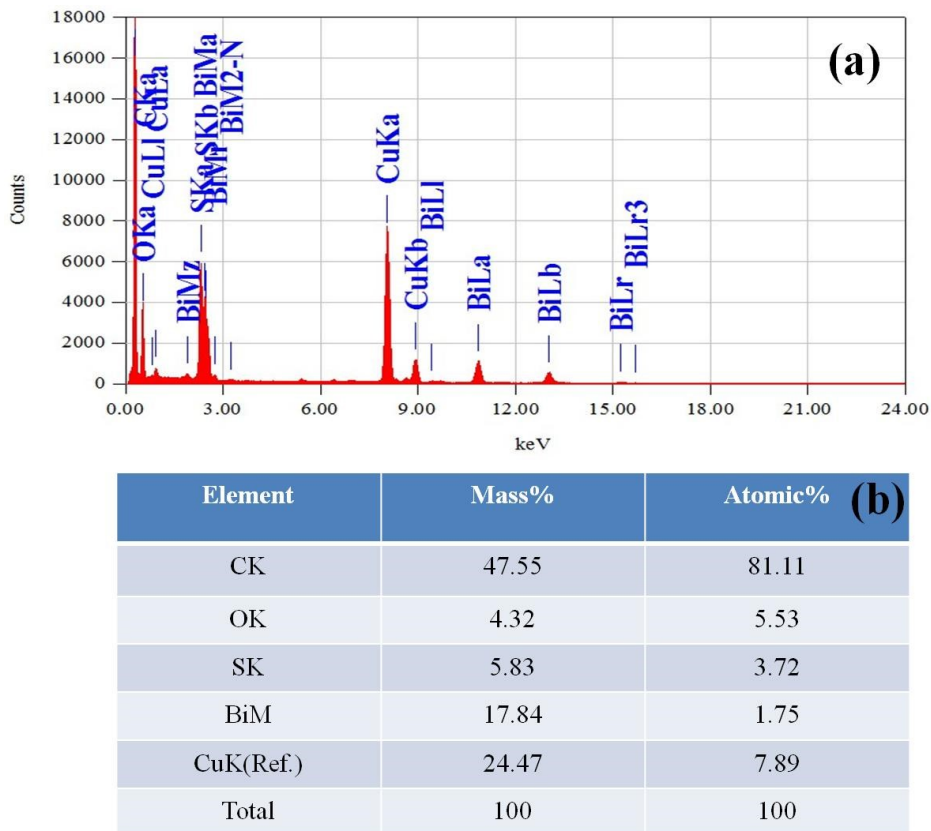

**Figure S2.** (a) EDX spectra and (b) elemental composition table of RGBS2 nanocomposite.

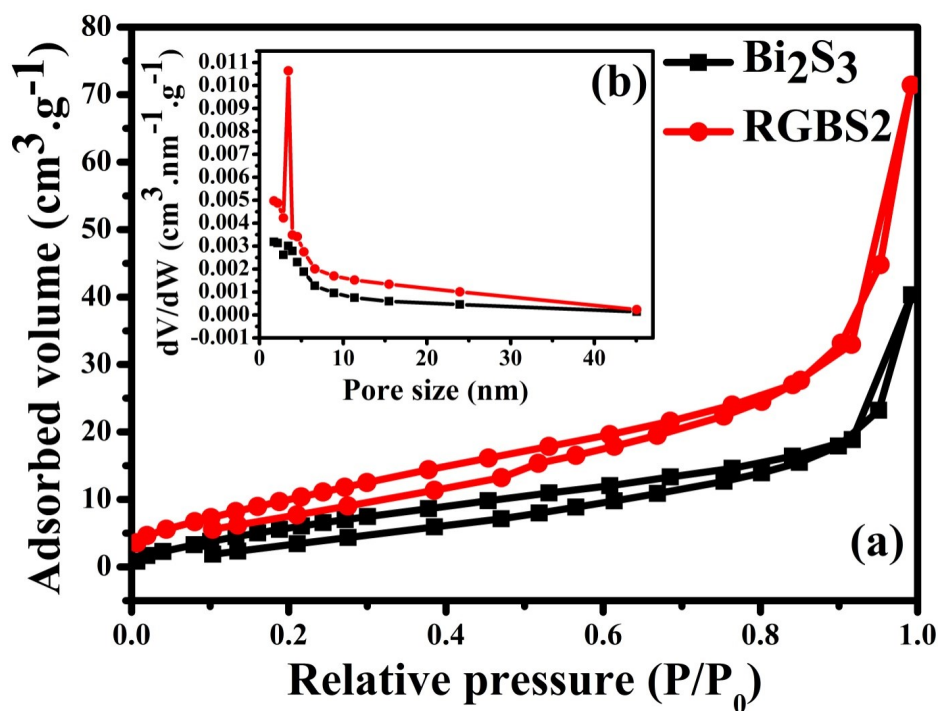

**Figure S3.** (a) N<sub>2</sub> adsorption-desorption isotherms and (b) pore size distribution of Bi<sub>2</sub>S<sub>3</sub> and RGBS2 nanocomposite.

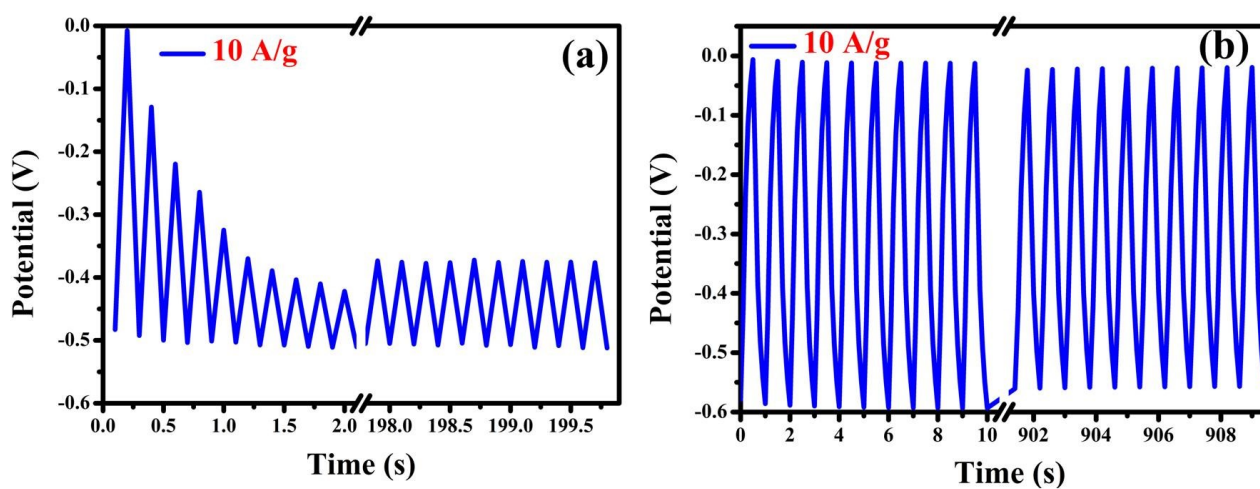

**Figure S4.** Charge-discharge curve of (a) Bi<sub>2</sub>S<sub>3</sub> and (b) RGO at a current density of 10 A g<sup>-1</sup> over 1000 cycles.

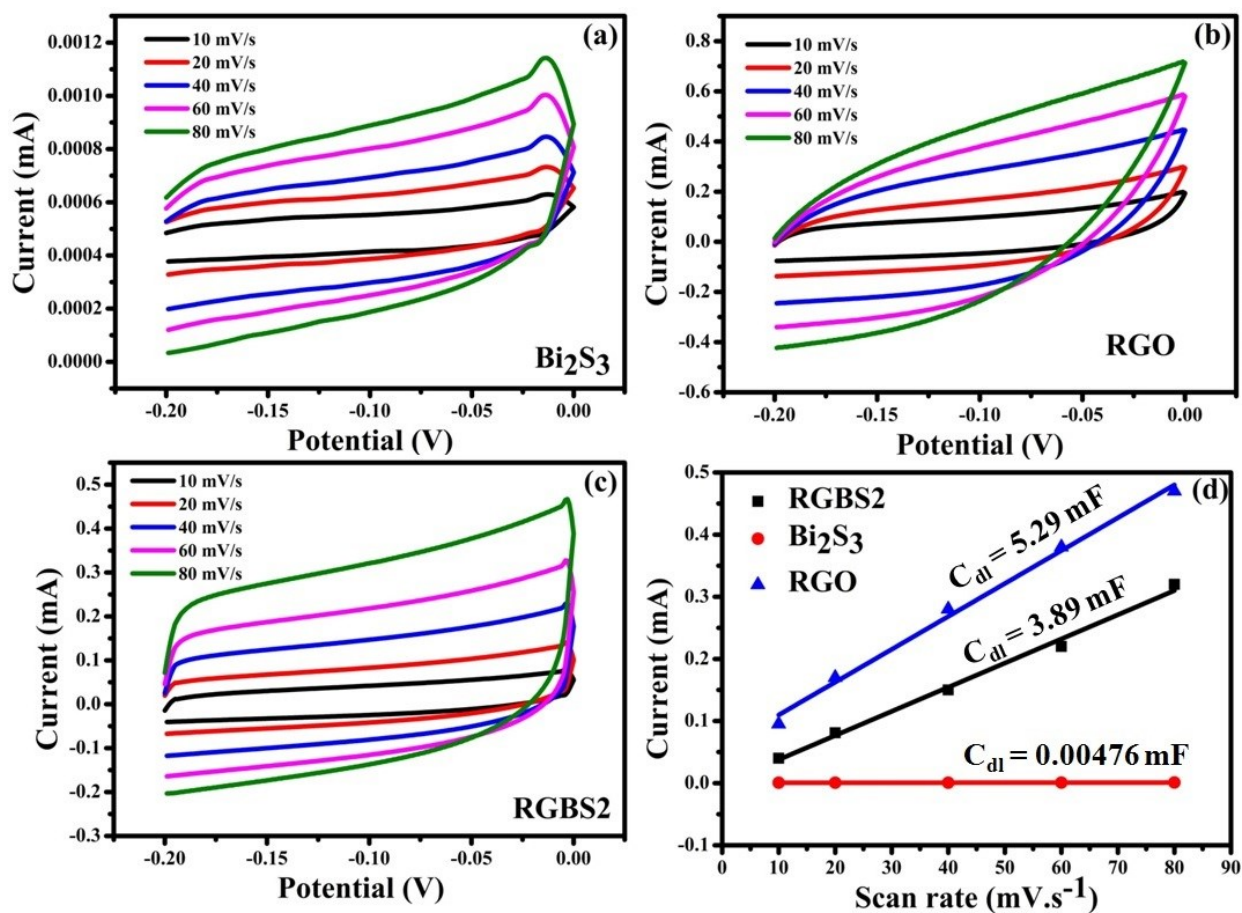

**Figure S5.** CV curve at different scan rate (10-80  $\text{mV}\cdot\text{s}^{-1}$ ) in the non-faradic region of (a)  $\text{Bi}_2\text{S}_3$ , (b) RGO and (c) RGBS2 and (d) their corresponding electrochemical double layer capacitance.

**Table S1.** ECSA values of  $\text{Bi}_2\text{S}_3$ , RGO and RGBS2 nanocomposite respectively

| Sample codes            | $C_{dl}$ (mF) | ECSA ( $\text{cm}^2$ ) |
|-------------------------|---------------|------------------------|
| $\text{Bi}_2\text{S}_3$ | 0.00476       | 0.1190                 |
| RGO                     | 5.29          | 132.25                 |
| RGBS2                   | 3.89          | 97.25                  |

**Reference:**

1. S. V. P. Vattikuti, A. K. R. Police, J. Shim and C. Byon, *Sci. Rep.*, 2018, **8**, 4194.
